# Supplementary material for: HPLC-LTQ-orbitrap MSn profiling method to comprehensively characterize multiple chemical constituents in xiao-er-qing-jie granules
Source: Royal Society of Chemistry journal article supplement (doi:10.1039/c5ay00420a), 2015-01-01
Supplement: c5ay00420a1.pdf [file c5ay00420a1.pdf]

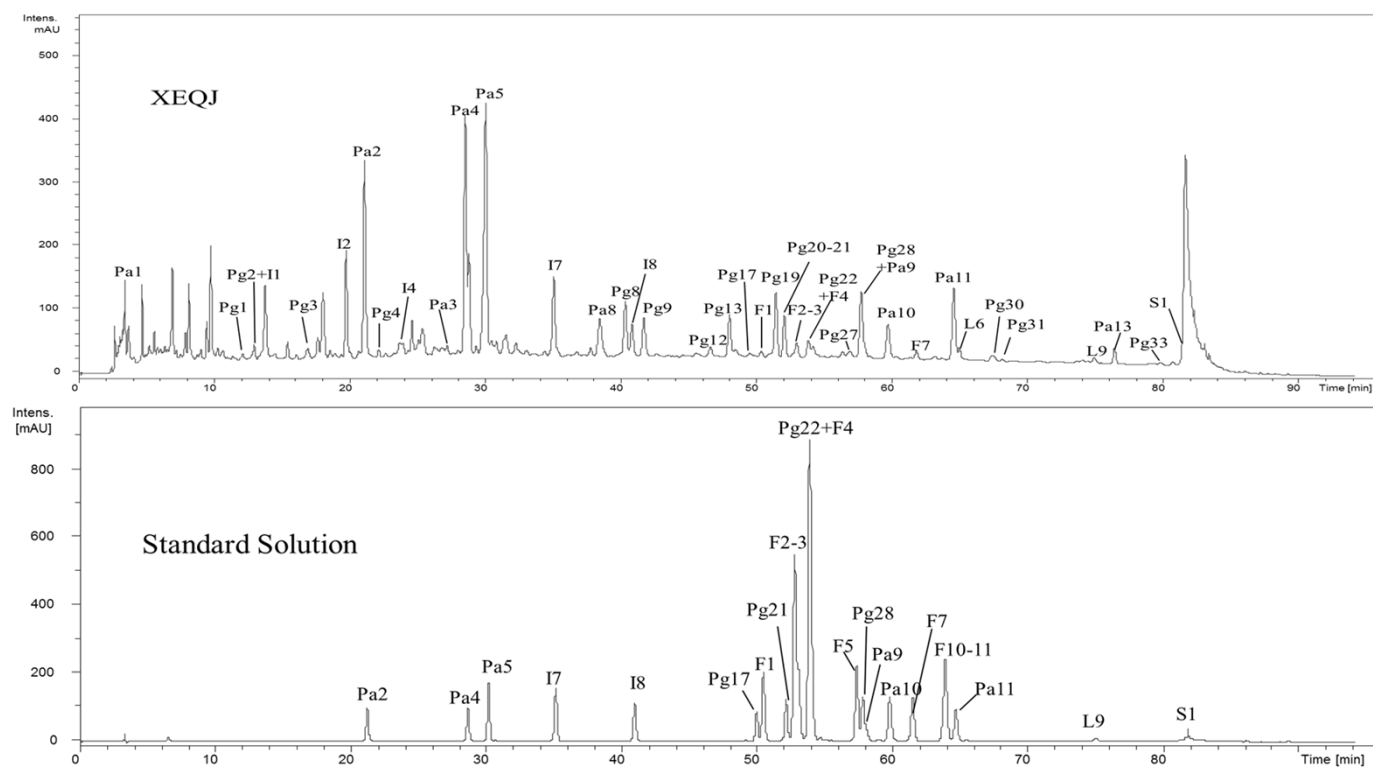

**Fig. 1.** HPLC/UV chromatograms of XEQJ and reference standards monitored at 254nm.

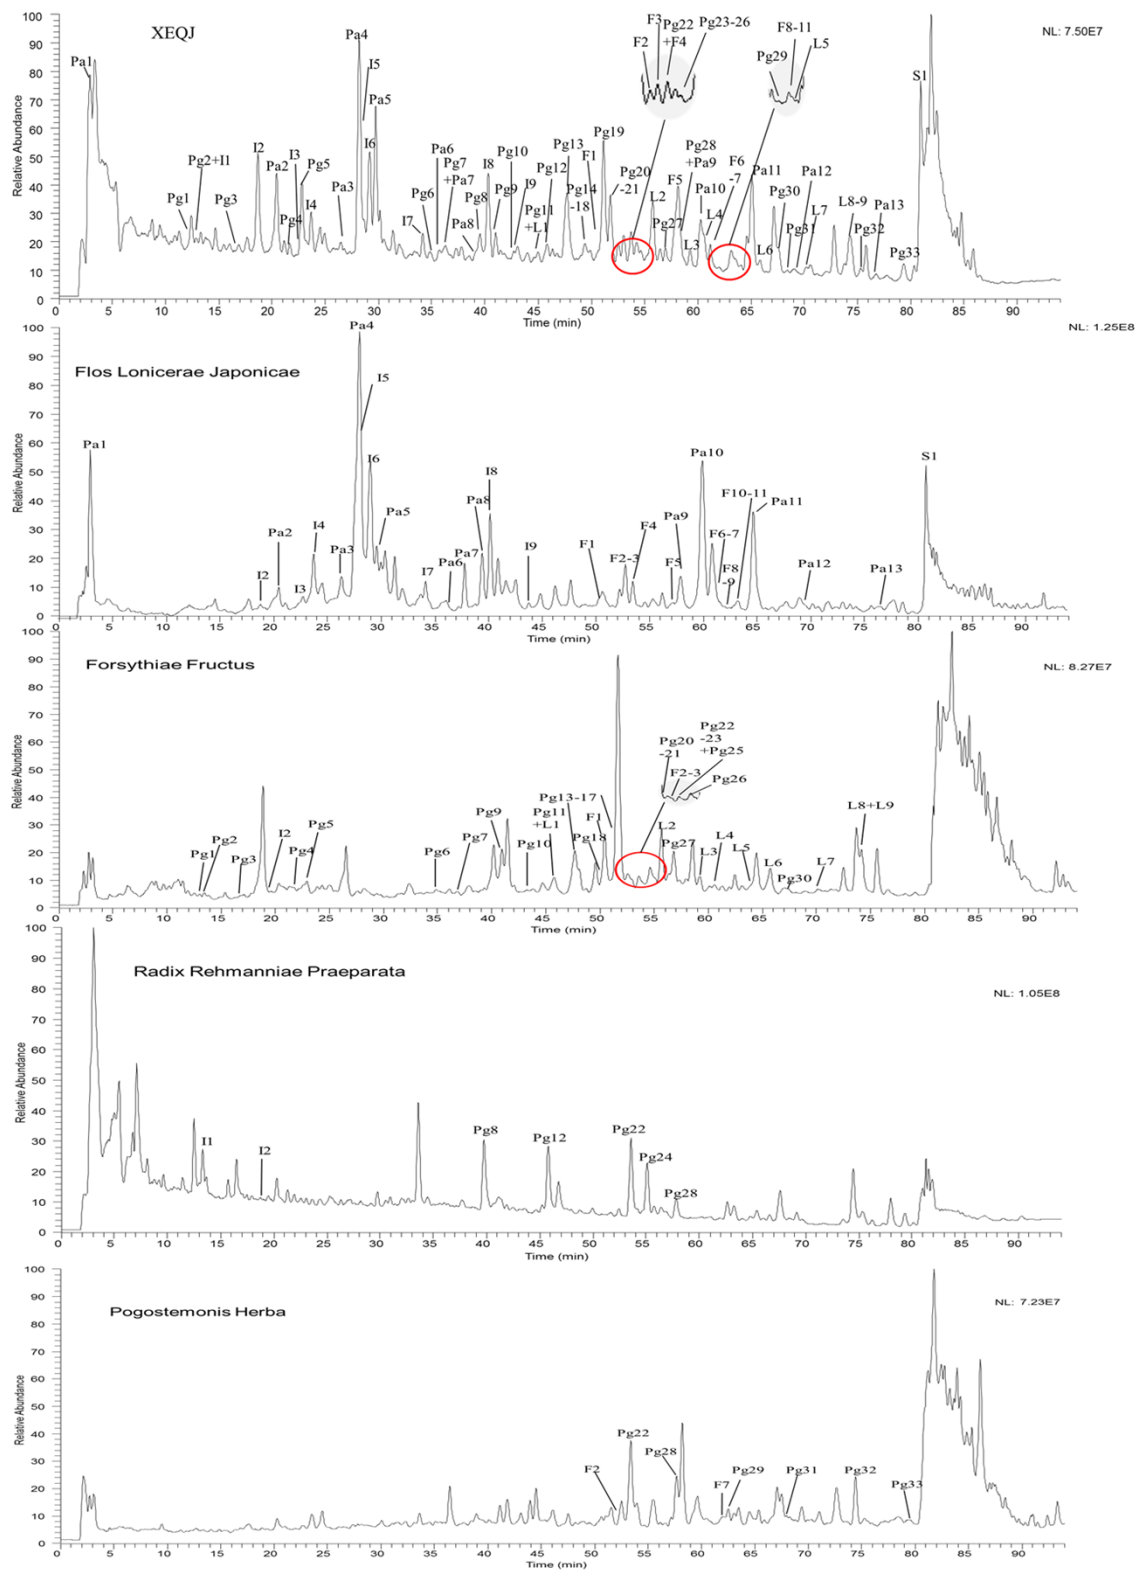

Fig. 2. ESI-MS total ion chromatograms of XEQJ and single herbs scanned in negative ion mode

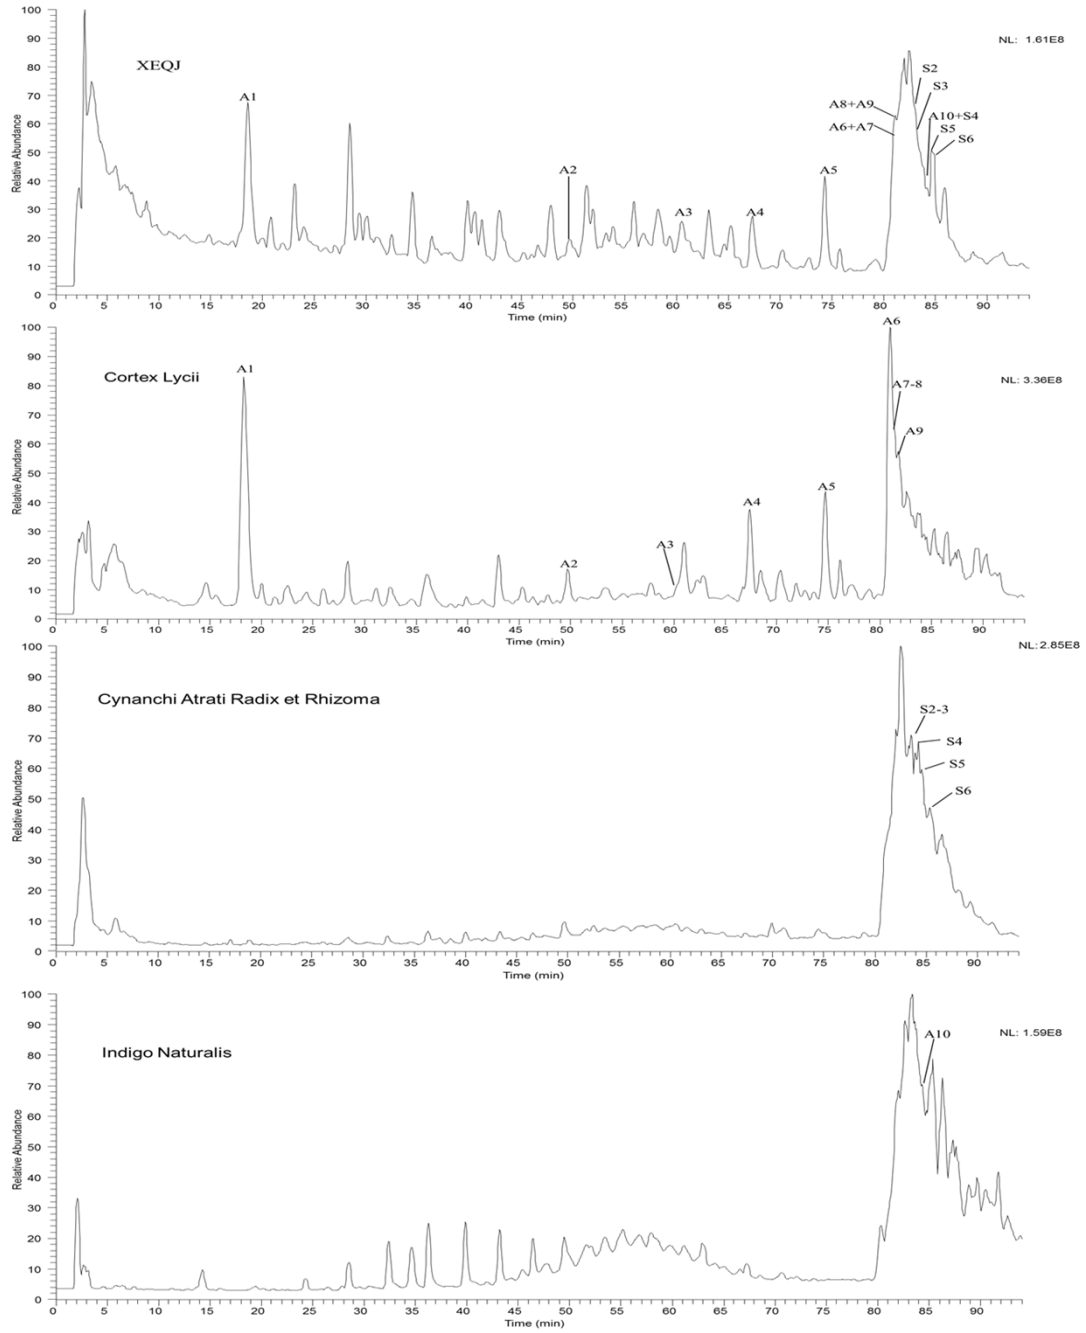

**Fig. 3.** ESI-MS total ion chromatograms of XEQJ and single herbs scanned in positive ion mode
